# Supplementary material for: Prognostic value of soluble PD-L1 and exosomal PD-L1 in advanced gastric cancer patients receiving systemic chemotherapy
Source: Springer Nature journal article supplement (doi:10.1038/s41598-023-33128-9), 2023-04-28
Supplement: MOESM1 [file 41598_2023_33128_MOESM1_ESM.pdf]

## Supplementary Figures and Tables

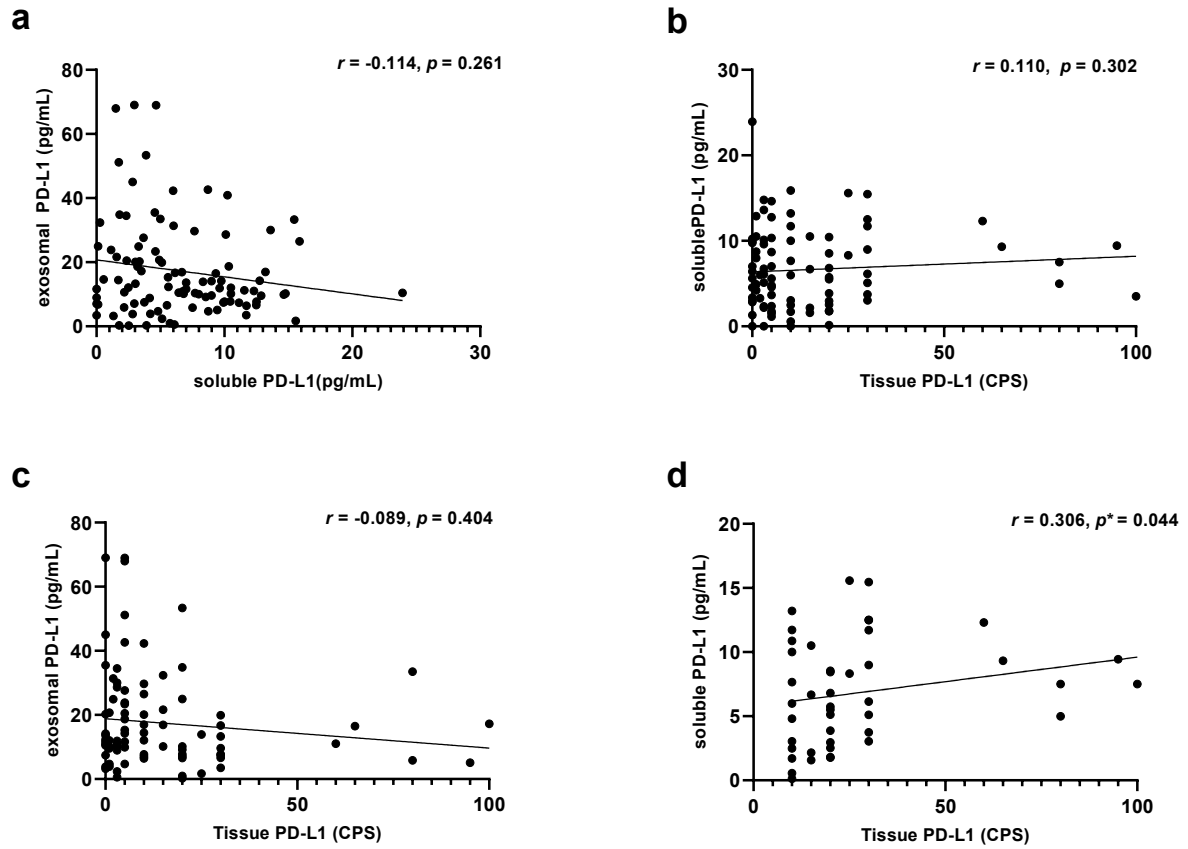

**Fig. S1 Correlation between extracellular PD-L1 and tissue PD-L1** (a) both sPD-L1 and exoPD-L1 showed no correlation (b, c) CPS and both extracellular PD-L1 showed no correlation. (d) CPS and sPD-L1 showed a weak correlation in patients with  $CPS \geq 10$  (Spearman's  $\rho = 0.306$ ,  $p = 0.044$ ). Statistical analysis was performed using Spearman correlation. *CPS* : combined positive Score

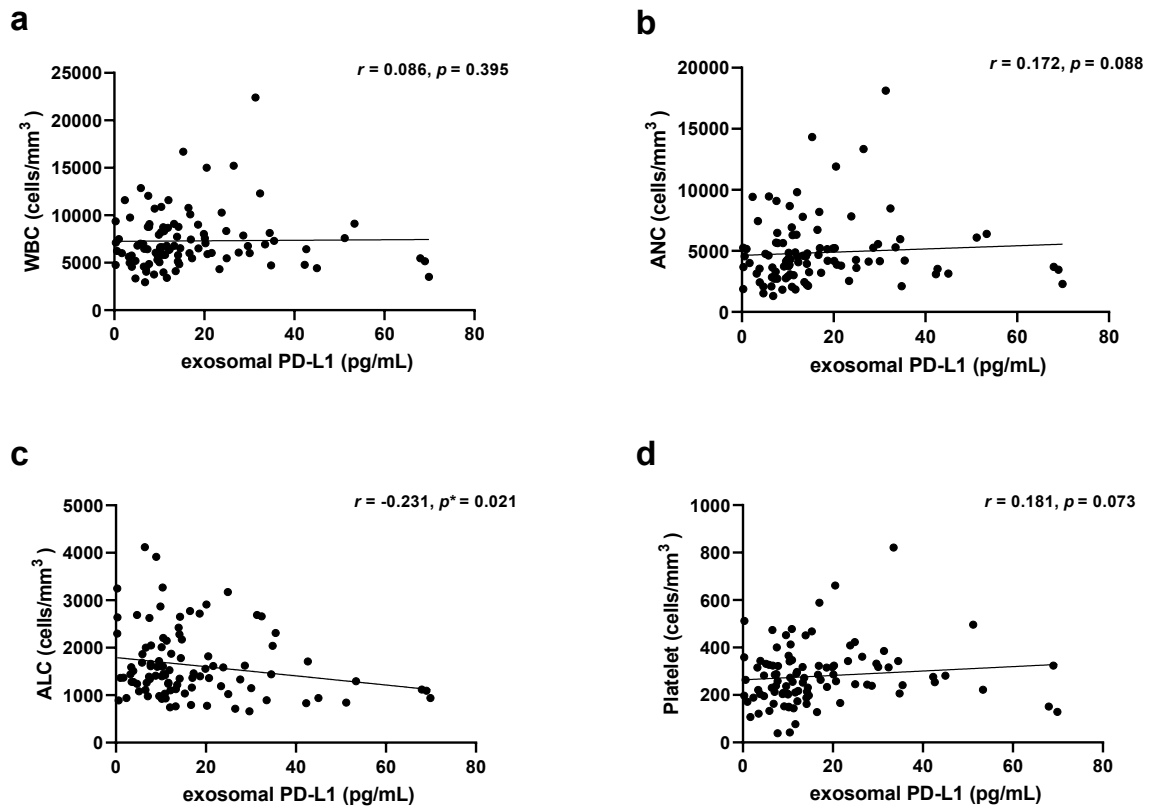

**Fig. S2** Correlation between exoPD-L1 and white blood cell (WBC), absolute neutrophil count (ANC), absolute lymphocyte count (ALC), and platelet. (a, b, c, d) exoPD-L1 was tending to be correlated with ANC and platelet. exoPD-L1 was negatively correlated with ALC (Spearman's  $r = -0.231$ ,  $p = 0.021$ ). Statistical analysis was performed using Spearman correlation.

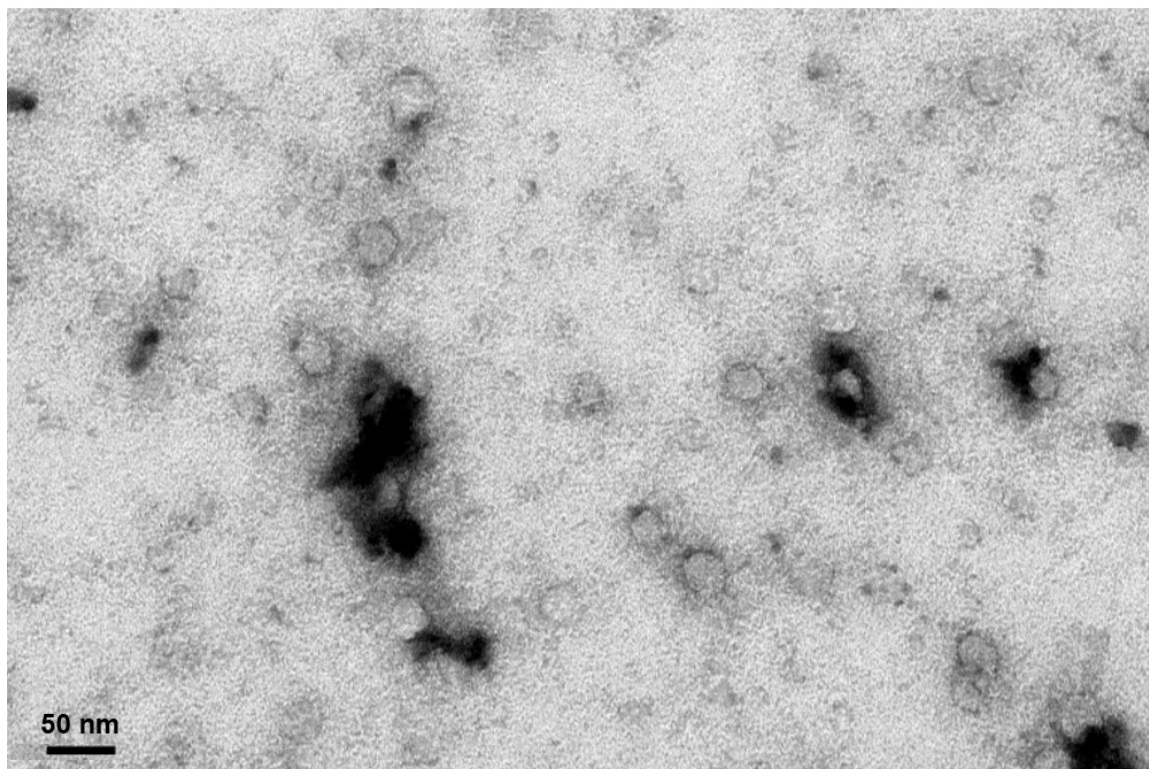

**Fig. S3** Representative electron microscopy image of isolated serum exosomes from patients with advanced gastric cancer. Transmission Electron Microscopy (TEM) verified less than 50nm sized sphere-shaped vesicles with bilayer.

**Supplementary Table S1**

| <b>Antibody</b>               | <b>Supplier</b>          | <b>Cat. No.</b> |
|-------------------------------|--------------------------|-----------------|
| <b><u>FACS</u></b>            |                          |                 |
| CD4                           | BioLegend                | 357416          |
| CD8                           | BioLegend                | 300910          |
| CD69                          | BioLegend                | 310912          |
| CD45                          | BioLegend                | 368510          |
| CD3                           | BioLegend                | 317314          |
| PD-1                          | BioLegend                | 329908          |
| <b><u>ELISA</u></b>           |                          |                 |
| TGF-beta1                     | R & D Systems            | DY240           |
| TGF-beta2                     | R & D Systems            | DY3020          |
| Ki-67                         | R & D Systems            | DY7617-052      |
| GranzymeB                     | R & D Systems            | DY2906-05       |
| IL-10                         | R & D Systems            | DY217B-05       |
| IFN- $\gamma$                 | R & D Systems            | DY285B-05       |
| PD-L1                         | R & D Systems            | DY156           |
| <b><u>Exosome markers</u></b> |                          |                 |
| CD63                          | Santa Cruz Biotechnology | Sc-5275         |
| TSG101                        | Santa Cruz Biotechnology | Sc-7964         |
